# Supplementary material for: Crimean-Congo hemorrhagic fever virus protein GP38 from isolate M18-China confers broad immunological breadth
Source: Research Square preprint supplement (doi:10.21203/rs.3.rs-9727753/v1), 2026-05-19
Supplement: Supplementary file 1 [file 480c53b7d04047a9512938b0.docx]

**Crimean-Congo hemorrhagic fever virus protein GP38 from isolate M18-China confers broad immunological breadth**

**SUPPLEMENTAL 2: Gels and Blots**

Albert Wang,1† Stephanie R. Monticelli,2,3† Christy K. Hjorth,4* Thomas Batchelor,2,5* Alexandra L. Tse,1 Ana I. Keuhne,2 Russell R. Bakken,2 N. A. Saavedra-Avila,1* Gorka Lasso,1* Jacob Berrigan,1 Steven A. Porcelli,1 Jason S. McLellan,4 Andrew S. Herbert,2# Kartik Chandran1#

1 Department of Microbiology and Immunology, Albert Einstein College of Medicine, Bronx, NY, USA

2 U.S. Army Medical Research Institute of Infectious Diseases, Fort Detrick, MD, USA

3 Henry M. Jackson Foundation for Military Advancement, Fort Detrick, MD, USA

4 Department of Molecular Biosciences, The University of Texas at Austin, Austin, Texas, USA

5 Oak Ridge Institute of Science Education, Oak Ridge, TN, USA

# Correspondence: kartik.chandran@einsteinmed.edu, andrew.s.herbert4.civ@health.mil

* Present addresses: Christy K. Hjorth, GlaxoSmithKline, Cambridge, MA, USA. Thomas Batchelor, Department of Molecular, Cell, and Developmental Biology, University of California, Santa Cruz, CA, USA. N. A. Saavedra-Avila, Gilead Sciences, Foster City, CA, USA. Gorka Lasso, Institute of Infection, Immunity and Transplantation, University College London, London, United Kingdom.

† Albert Wang and Stephanie R. Monticelli contributed equally to this work.

**Supplemental figure 1C:**

purification of rGP38 IbAr10200, Oman, Hoti, Turkey2004, Afg09, M18-China


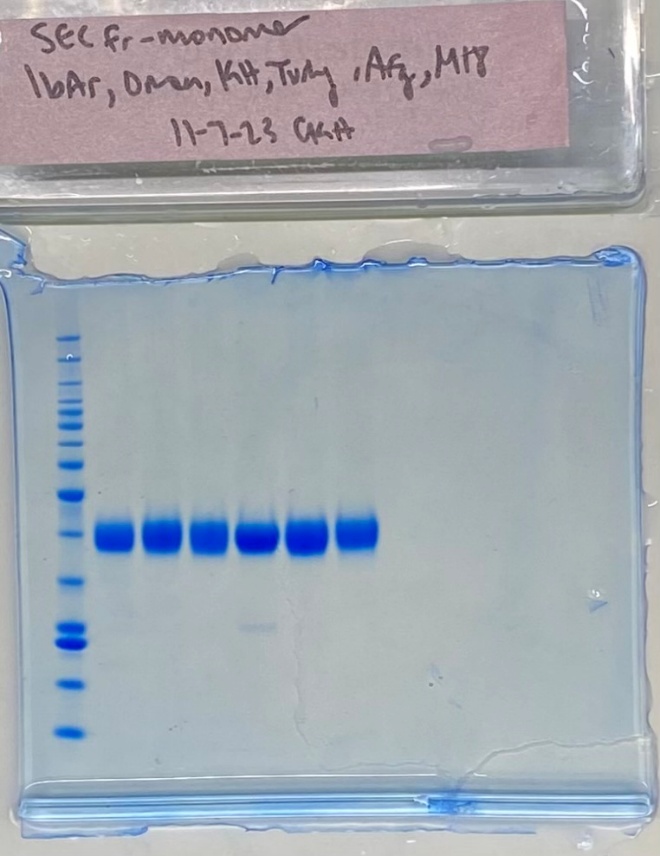


**Supplemental Figure 2B:** rGP38 treatment with HRV 3C protease

**
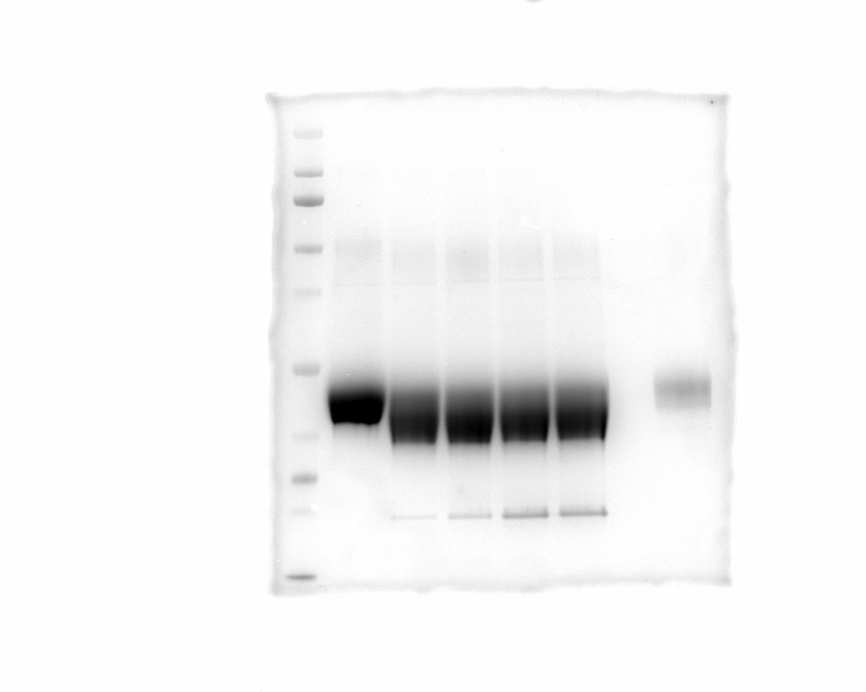
**

**Supplemental Figure 2C**

Chimera rGP38 purification: Oman, M18-China, OVar1

**
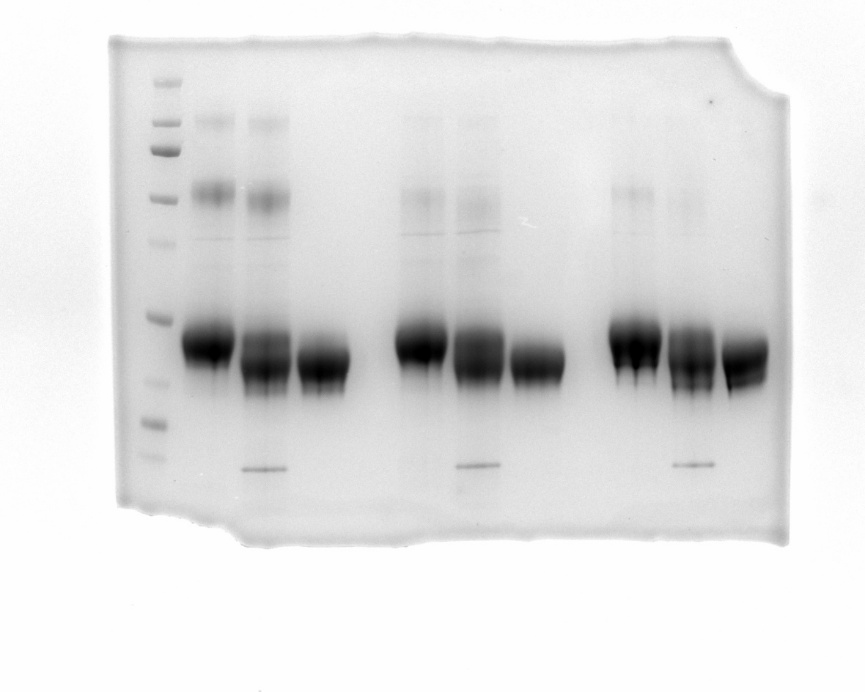
**

Chimera rGP38 purification: OVar2, ONTer, ON-v1-v2

**
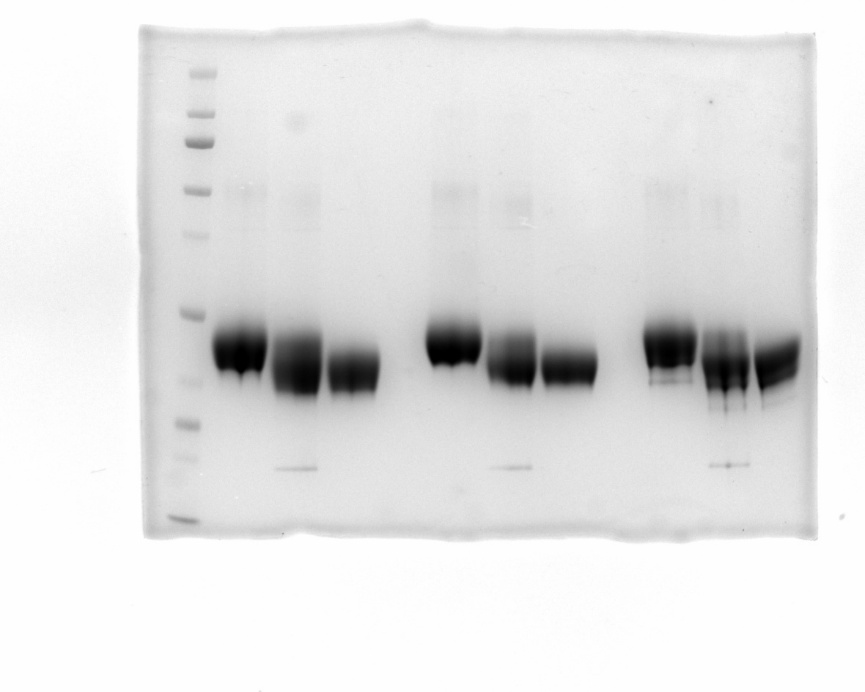
**

**Main Figure 6C**

rVSV-GP38_IbAr, IbAr-T

**
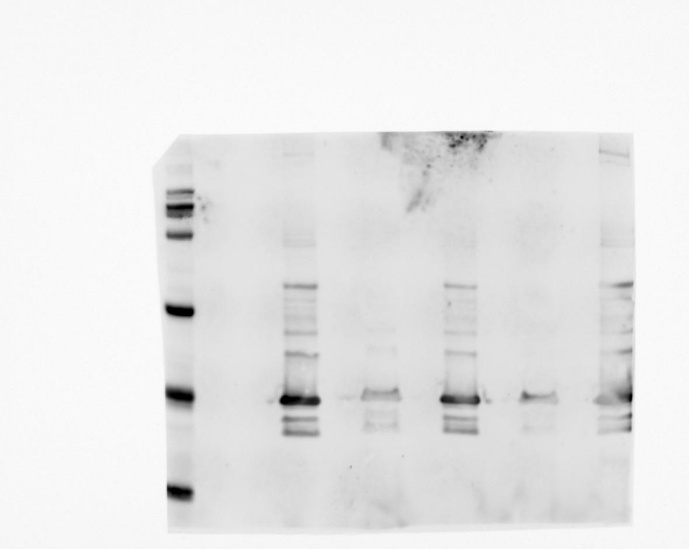

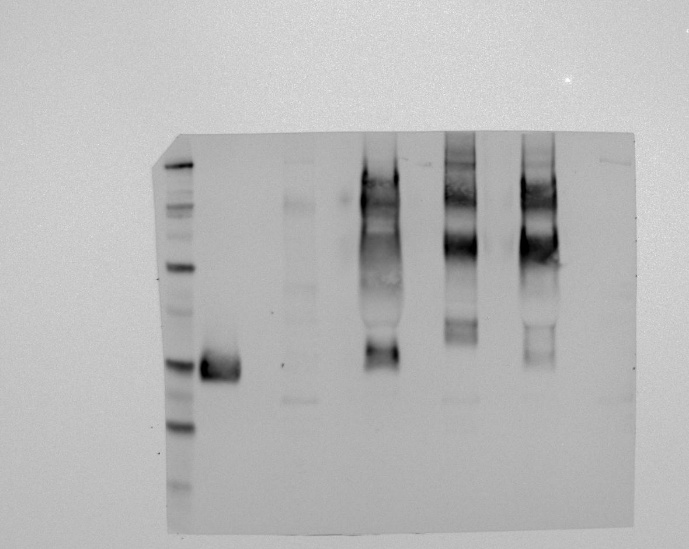
**

rVSV-GP38_M18, M18-T

**
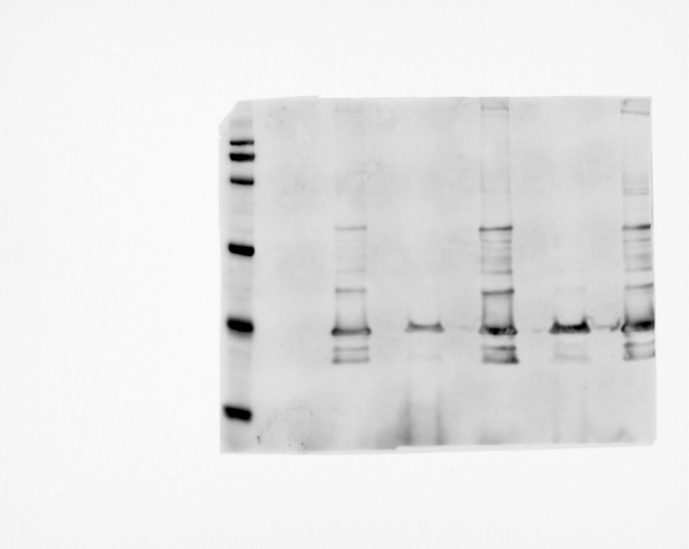

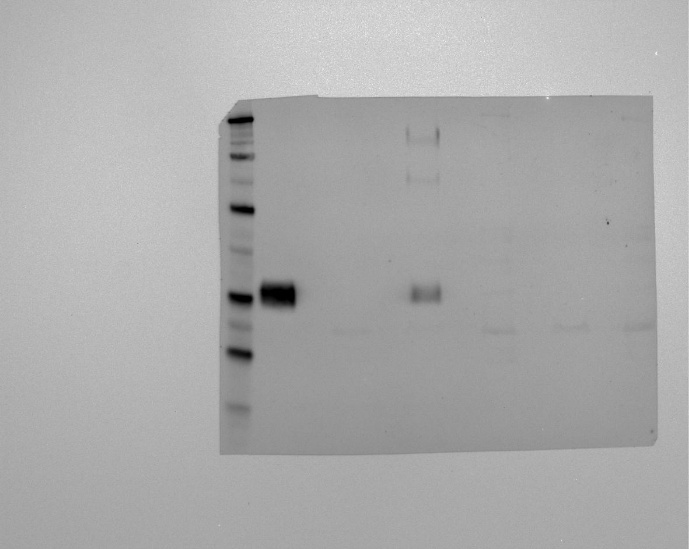
**
